# Supplementary material
Source: PubMed Central journal article supplement (PMC3860279)
Supplement: NIHMS517802-supplement-Supplementary_Table_1.pdf [file NIHMS517802-supplement-Supplementary_Table_1.pdf]

**Supplemental Table 1: List of situations of genetic discrimination in questionnaire**

|                                               |
|-----------------------------------------------|
| <b>Insurance</b>                              |
| by life insurance company or agent            |
| by long term disability company or agent      |
| by mortgage company or agent                  |
| <b>Family</b>                                 |
| when making choices about having children     |
| by family member                              |
| by spouse                                     |
| <b>Social</b>                                 |
| by friend                                     |
| when establishing a relationship              |
| by boy/girlfriend                             |
| by community                                  |
| at school                                     |
| by religious organization                     |
| <b>Employment</b>                             |
| at work                                       |
| when getting a job                            |
| <b>Health Care</b>                            |
| when getting medical care                     |
| by doctor                                     |
| by other health care professional(s)          |
| by genetic counseling service                 |
| <b>Public Sector</b>                          |
| when getting access to or custody of children |
| in the law courts                             |
| by adoption agency                            |
| by blood bank                                 |
| by Canadian Forces                            |
